# Supplementary material
Source: Springer Nature journal article supplement (https://www.springermedizin.de/resource/supplementary/12245_2011_40_MOESM2_ESM.pdf/9672650)

**Time of bites**

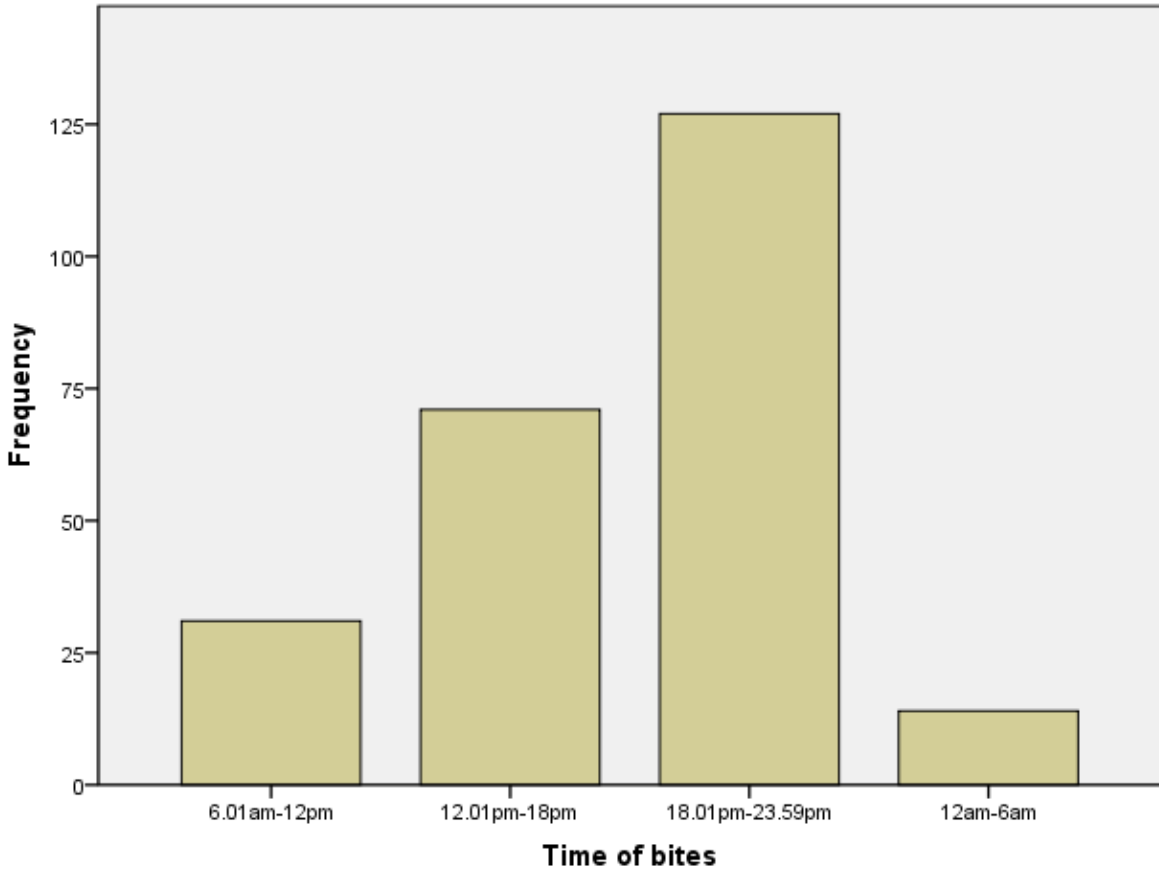

Supplement: MOESM2 [file 9672650]
